# Supplementary material
Source: Springer Nature journal article supplement (https://www.springermedizin.de/resource/supplementary/12885_2014_4652_MOESM7_ESM.pdf/9466956)
Supplement: MOESM7 [file 9466956]

Table 3. Putative predispositions in familial breast cancer families and probands

| Gene     | Description                                        | Position                                                | Nucleotide      | Amino acid | Type     | PolyPhen2* |            | Cancer-affected member |   |   |   |   |   |   |   | Frequency |
|----------|----------------------------------------------------|---------------------------------------------------------|-----------------|------------|----------|------------|------------|------------------------|---|---|---|---|---|---|---|-----------|
|          |                                                    |                                                         |                 |            |          | Score      | Prediction | 1                      | 2 | 3 | 4 | 6 | 7 | 8 |   |           |
| Family 1 |                                                    |                                                         |                 |            |          |            |            |                        |   |   |   |   |   |   |   |           |
| GPRIN1   | G protein regulated inducer of neurite outgrowth 1 | chr5:176026123                                          | c.T713C         | p.L238S    | exonic   | 0.91       | D          | -                      | + | + | + | + | + | - | 5 |           |
| PINK1    | PTEN induced putative kinase 1                     | chr1:20972051                                           | c.960-2A>G      |            | splicing | NA         | NA         | -                      | - | + | + | - | - | - | 2 |           |
| POLK     | polymerase (DNA directed) kappa                    | chr5:74892737                                           | c.A2219G        | p.H740R    | exonic   | 0.62       | P          | -                      | - | - | + | - | - | - | 1 |           |
| Family 2 |                                                    |                                                         |                 |            |          |            |            |                        |   |   |   |   |   |   |   |           |
| KAT6B    | K(lysine) acetyltransferase 6B                     | chr10:76789128                                          | c.G4546T        | p.D1516Y   | exonic   | 0.95       | D          | -                      | + | + | + | + | + |   | 5 |           |
| KAT6B    | K(lysine) acetyltransferase 6B                     | chr10:76789311                                          | c.C4729T        | p.R1577C   | exonic   | 0.96       | D          | -                      | + | + | + | + | + |   | 5 |           |
| NOTCH2   | Notch 2                                            | chr1:120459167                                          | c.C6178T        | p.R2060C   | exonic   | 0.99       | D          | -                      | - | + | - | - | + |   | 2 |           |
| Family 3 |                                                    |                                                         |                 |            |          |            |            |                        |   |   |   |   |   |   |   |           |
| NANP     | N-acetylneuraminic acid phosphatase                | chr20:25596725                                          | c.A583G         | p.I195V    | exonic   | 0.98       | D          | +                      | - | + | - | - |   |   | 2 |           |
| PHKB     | phosphorylase kinase, beta                         | chr16:47628126                                          | c.1204+1G>T     |            | splicing | NA         | NA         | -                      | + | - | + | - |   |   | 2 |           |
| Proband  |                                                    |                                                         |                 |            |          |            |            |                        |   |   |   |   |   |   |   |           |
| 1        | JAKMIP3                                            | Janus kinase and microtubule interacting protein 3      | chr10:133955524 | c.G1574C   | p.G525A  | exonic     | 1.00       | D                      |   |   |   |   |   |   |   |           |
| 2        | POLQ                                               | polymerase (DNA directed), theta                        | chr3:121207798  | c.A3980C   | p.Q1327P | exonic     | 1.00       | D                      |   |   |   |   |   |   |   |           |
| 3        | DUX2                                               | double homeobox 2                                       | chr10:135494906 |            |          | splicing   | NA         | NA                     |   |   |   |   |   |   |   |           |
| 4        | UBE2L3                                             | ubiquitin-conjugating enzyme E2L 3                      | chr22:21975938  | c.G349A    | p.E117K  | exonic     | 0.96       | D                      |   |   |   |   |   |   |   |           |
| 5        | RAD23B                                             | RAD23 homolog B (S. cerevisiae)                         | chr9:110087260  | c.C1028T   | p.P343L  | exonic     | 0.99       | D                      |   |   |   |   |   |   |   |           |
| 7        | GATA3                                              | GATA binding protein 3                                  | chr10:8100630   | c.C604T    | p.R202C  | exonic     | 0.92       | D                      |   |   |   |   |   |   |   |           |
| 8        | KAT6B                                              | K(lysine) acetyltransferase 6B                          | chr10:76744854  | c.G2390A   | p.S797N  | exonic     | 0.98       | D                      |   |   |   |   |   |   |   |           |
| 9        | LIG1                                               | ligase I, DNA, ATP-dependent                            | chr19:48637322  | c.G1525A   | p.E509K  | exonic     | 0.95       | D                      |   |   |   |   |   |   |   |           |
| 10       | LIG4                                               | ligase IV, DNA, ATP-dependent                           | chr13:108862463 | c.G1154A   | p.R385K  | exonic     | 1.00       | D                      |   |   |   |   |   |   |   |           |
| 14       | NOTCH2                                             | Notch 2                                                 | chr1:120529603  | c.G854A    | p.R285H  | exonic     | 1.00       | D                      |   |   |   |   |   |   |   |           |
| 15       | ABL1                                               | c-abl oncogene 1, non-receptor tyrosine kinase          | chr9:133729493  | c.G122A    | p.G41D   | exonic     | 0.92       | D                      |   |   |   |   |   |   |   |           |
| 16       | TNK2                                               | tyrosine kinase, non-receptor, 2                        | chr3:195596385  | c.C1760T   | p.P587L  | exonic     | 1.00       | D                      |   |   |   |   |   |   |   |           |
| 17       | NFRKB                                              | nuclear factor related to kappaB binding protein        | chr11:129755398 | c.G611A    | p.R204H  | exonic     | 1.00       | D                      |   |   |   |   |   |   |   |           |
| 18       | NFKBIZ                                             | nuclear factor of kappa light polypeptide gene enhancer | chr3:101576029  |            |          | splicing   | NA         | NA                     |   |   |   |   |   |   |   |           |
| 19       | SMG1                                               | SMG1 phosphatidylinositol 3-kinase-related kinase       | chr16:18879624  | c.C3083T   | p.T1028M | exonic     | 0.99       | D                      |   |   |   |   |   |   |   |           |
| 20       | PRKCQ                                              | protein kinase C, theta                                 | chr10:6528042   | c.G855C    | p.Q285H  | exonic     | 1.00       | D                      |   |   |   |   |   |   |   |           |
| 21       | ADRA2A                                             | adrenoceptor alpha 2A                                   | chr10:112838117 | c.C363G    | p.C121W  | exonic     | 1.00       | D                      |   |   |   |   |   |   |   |           |
| 22       | PPFIA4                                             | protein tyrosine phosphatase, receptor type             | chr1:203025582  | c.C668T    | p.T223M  | exonic     | 0.92       | D                      |   |   |   |   |   |   |   |           |

D: Probably damaging (score: 0.909-1); P: Possibly damaging (score: 0.447 - 0.908)
